# Supplementary material for: Dysfunction of the plasmacytoid dendritic cells induced by Enterovirus 71
Source: Research Square preprint supplement (doi:10.21203/rs.3.rs-7621062/v1), 2025-10-22

**A.**

**The expression of GAPDH in pDC lysates of control and critical HFMD patients were detected by western blotting.**


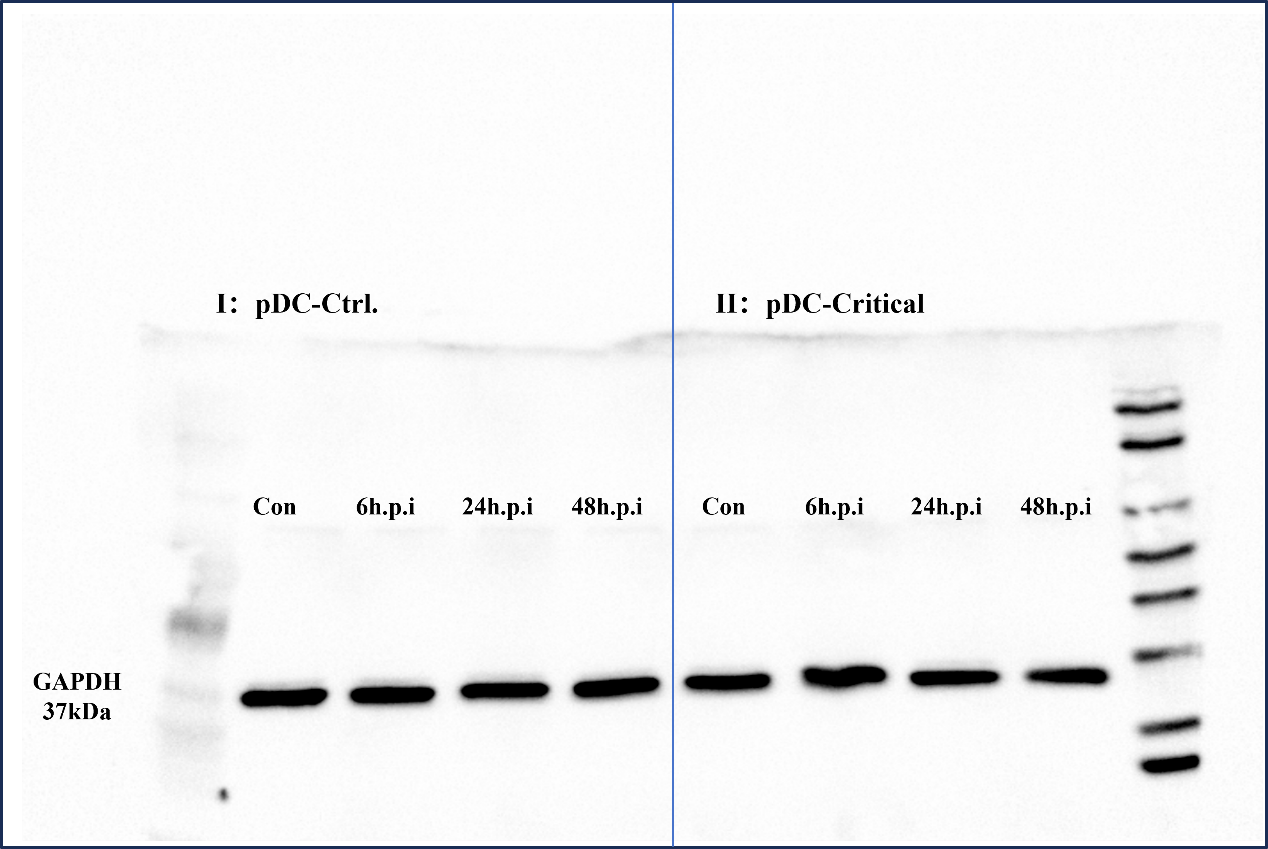


**B.**

**EV71-VP1 expression in pDC lysates of healthy donors were detected by western blotting.**

**
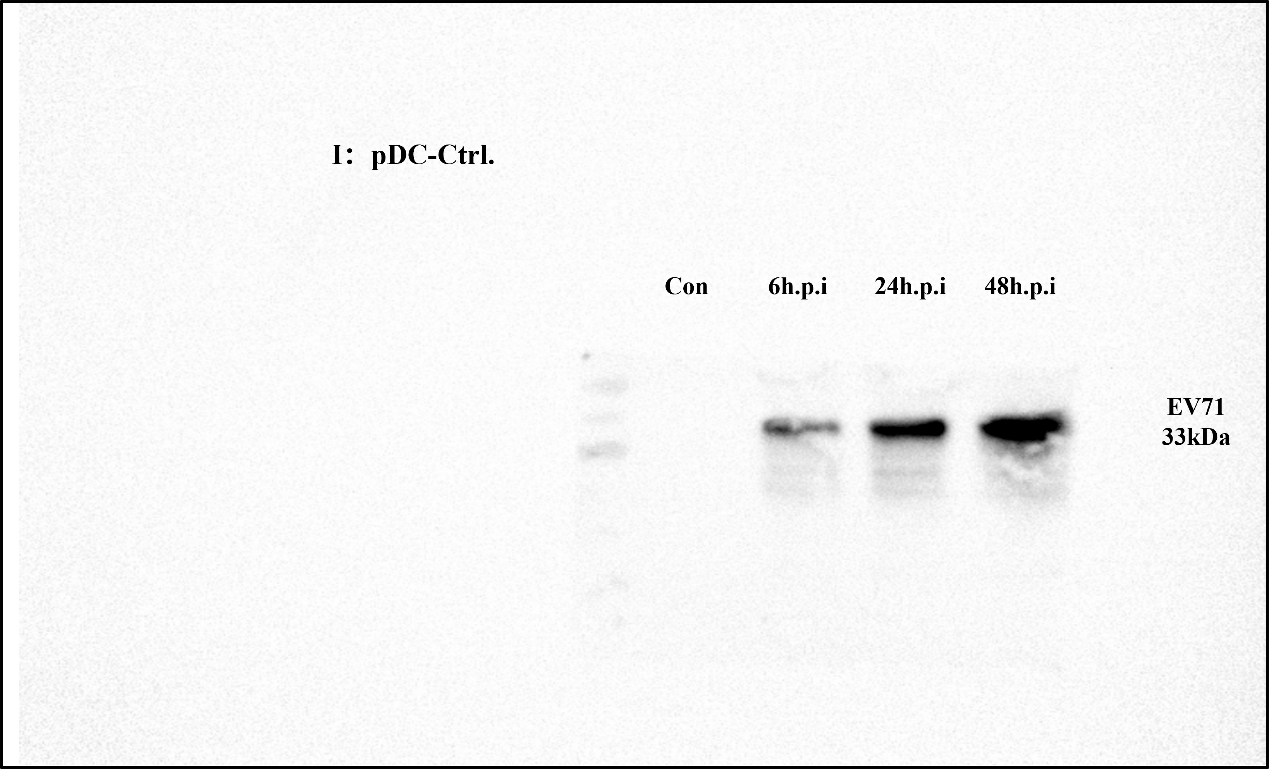
**

**C.**

**EV71-VP1 expression in pDC lysates of critical HFMD patients were detected by western blotting.**


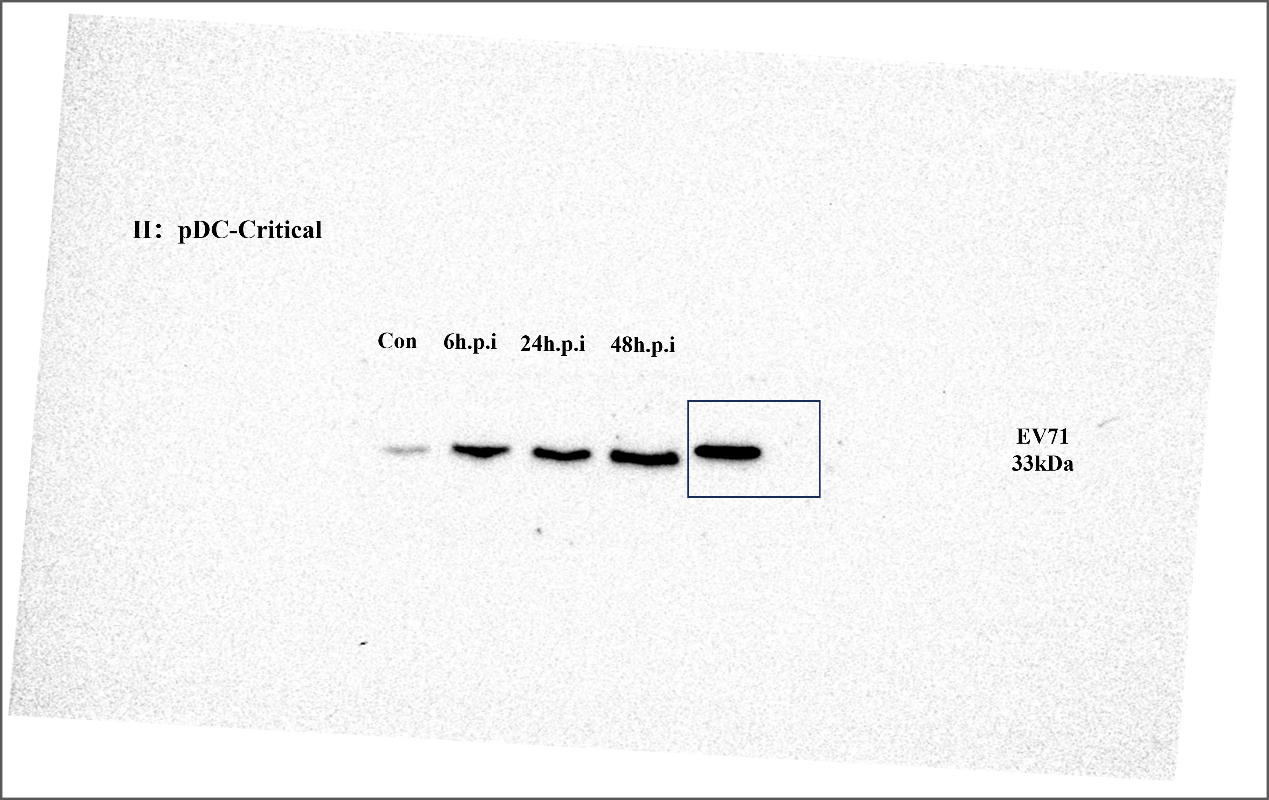

Supplement: Supplementary file 1 [file 61e64edca374bc0c429fa400.docx]
